# Supplementary material for: Total parasite biomass but not peripheral parasitaemia is associated with endothelial and haematological perturbations in Plasmodium vivax patients
Source: eLife. 2021 Sep 29;10:e71351. doi: 10.7554/eLife.71351 (PMC8536259; doi:10.7554/eLife.71351)
Supplement: Figure 2—figure supplement 2—source data 1. — The metrics of interest is jaccard_index which measures the cluster similarity across bootstrap samples. Jaccard_index ranges from 0 to 1, an index < 0.6 hints at a weak, unreliable cluster while > 0.85 means generally reliable. [file elife-71351-fig2-figsupp2-data1.xls]

## Sheet: kmeans_bootstrap
n_clusters	seed	withinss	jaccard_index	cluster_id	cluster_size
2	1	1122	0.903	1	21
2	1	1122	0.86	2	18
3	9	994.6	0.86	1	21
3	9	994.6	0.726	2	14
3	9	994.6	0.539	3	4
3	3	996.6	0.852	1	19
3	3	996.6	0.702	2	16
3	3	996.6	0.559	3	4
3	14	994.4	0.861	1	21
3	14	994.4	0.757	2	16
3	14	994.4	0.442	3	2
3	1	1028.2	0.693	1	16
3	1	1028.2	0.297	2	5
3	1	1028.2	0.834	3	18
3	4	1031.1	0.496	1	14
3	4	1031.1	0.499	2	9
3	4	1031.1	0.68	3	16
3	28	997.7	0.425	1	2
3	28	997.7	0.852	2	19
3	28	997.7	0.712	3	18
4	4	902	0.679	1	12
4	4	902	0.806	2	18
4	4	902	0.612	3	4
4	4	902	0.427	4	5
4	9	907.3	0.529	1	12
4	9	907.3	0.588	2	9
4	9	907.3	0.609	3	4
4	9	907.3	0.701	4	14
4	10	893.2	0.579	1	2
4	10	893.2	0.459	2	7
4	10	893.2	0.631	3	11
4	10	893.2	0.795	4	19
4	74	905.9	0.664	1	15
4	74	905.9	0.509	2	13
4	74	905.9	0.61	3	9
4	74	905.9	0.608	4	2
4	12	885.9	0.813	1	19
4	12	885.9	0.47	2	2
4	12	885.9	0.596	3	2
4	12	885.9	0.65	4	16
4	20	883.9	0.76	1	21
4	20	883.9	0.458	2	2
4	20	883.9	0.715	3	14
4	20	883.9	0.61	4	2
