# Supplementary material for: Total parasite biomass but not peripheral parasitaemia is associated with endothelial and haematological perturbations in Plasmodium vivax patients
Source: eLife. 2021 Sep 29;10:e71351. doi: 10.7554/eLife.71351 (PMC8536259; doi:10.7554/eLife.71351)
Supplement: Figure 2—source data 1. [file elife-71351-fig2-data1.xlsx]

## Sheet: Sheet1
PC1	correlation	p.value
VWF.A2	0.82565	9.89861e-11
TPO	0.819148	1.83768e-10
TNF	0.814193	2.89724e-10
IL.11	0.782722	3.92943e-09
E.selectin	0.782288	4.06116e-09
CD40L	0.727036	1.59192e-07
Syndecan.1	0.722477	2.07142e-07
L.Selectin	0.673013	2.67831e-06
PAI.1	0.599417	5.52351e-05
PvLDH	0.585046	9.16543e-05
P.selectin	0.577423	0.000118757
Parasitemia	0.565075	0.000178286
IL.8	0.554424	0.000249928
VCAM.1	0.541042	0.000376068
IL.10	0.535283	0.000446043
ICAM.1	0.518834	0.000714327
Ang.2	0.489315	0.00157086
IL.6	0.446389	0.00439254
NF	0.384132	0.0157659
IL.1a	0.382087	0.0163789
IL.1b	0.364961	0.0223445
CXCL7	0.324584	0.043797
Lymp	-0.723906	1.90839e-07
Plt	-0.761406	1.82245e-08
PC2	correlation	p.value
Ang.1	0.878826	1.89576e-13
CXCL4	0.87367	3.91628e-13
CXCL7	0.866703	9.94287e-13
PAI.1	0.628955	1.80024e-05
P.selectin	0.383371	0.0159917
IL.8	0.354376	0.0268659
TNF	0.354166	0.026963
MPV	-0.316222	0.0498545
Syndecan.1	-0.316645	0.0495328
IL.1a	-0.353083	0.0274668
PC3	correlation	p.value
Ht	0.858723	2.71614e-12
RBC	0.772775	8.20661e-09
Hb	0.728897	1.42759e-07
ICAM.1	0.546335	0.000320607
CD40L	0.492752	0.00143829
IL.11	0.401896	0.0112088
MPV	0.372409	0.0195589
IL.8	-0.318618	0.0480538
Ang.2	-0.354991	0.0265839
IL.6	-0.362868	0.0231844
SCF	-0.431504	0.00609244
